# Supplementary material for: Lack of evidence for involvement of TonEBP and hyperosmotic stimulus in induction of autophagy in the nucleus pulposus
Source: PubMed Central journal article supplement (PMC5495809; doi:10.1038/s41598-017-04876-2), 2017-07-03
Supplement: 41598_2017_4876_MOESM1_ESM.pdf [file 41598_2017_4876_MOESM1_ESM.pdf]

## **Supplementary Information**

### **Lack of evidence for involvement of TonEBP and hyperosmotic stimulus in induction of autophagy in the nucleus pulposus**

Chao Liu<sup>1,2</sup>, Hyowon Choi<sup>1</sup>, Zariel I. Johnson<sup>1</sup>, Jiwei Tian<sup>2</sup>, Irving M.  
Shapiro<sup>1</sup>, Makarand V. Risbud<sup>1\*</sup>

# Supplementary Figure S1-1. Examples of uncropped Western blots

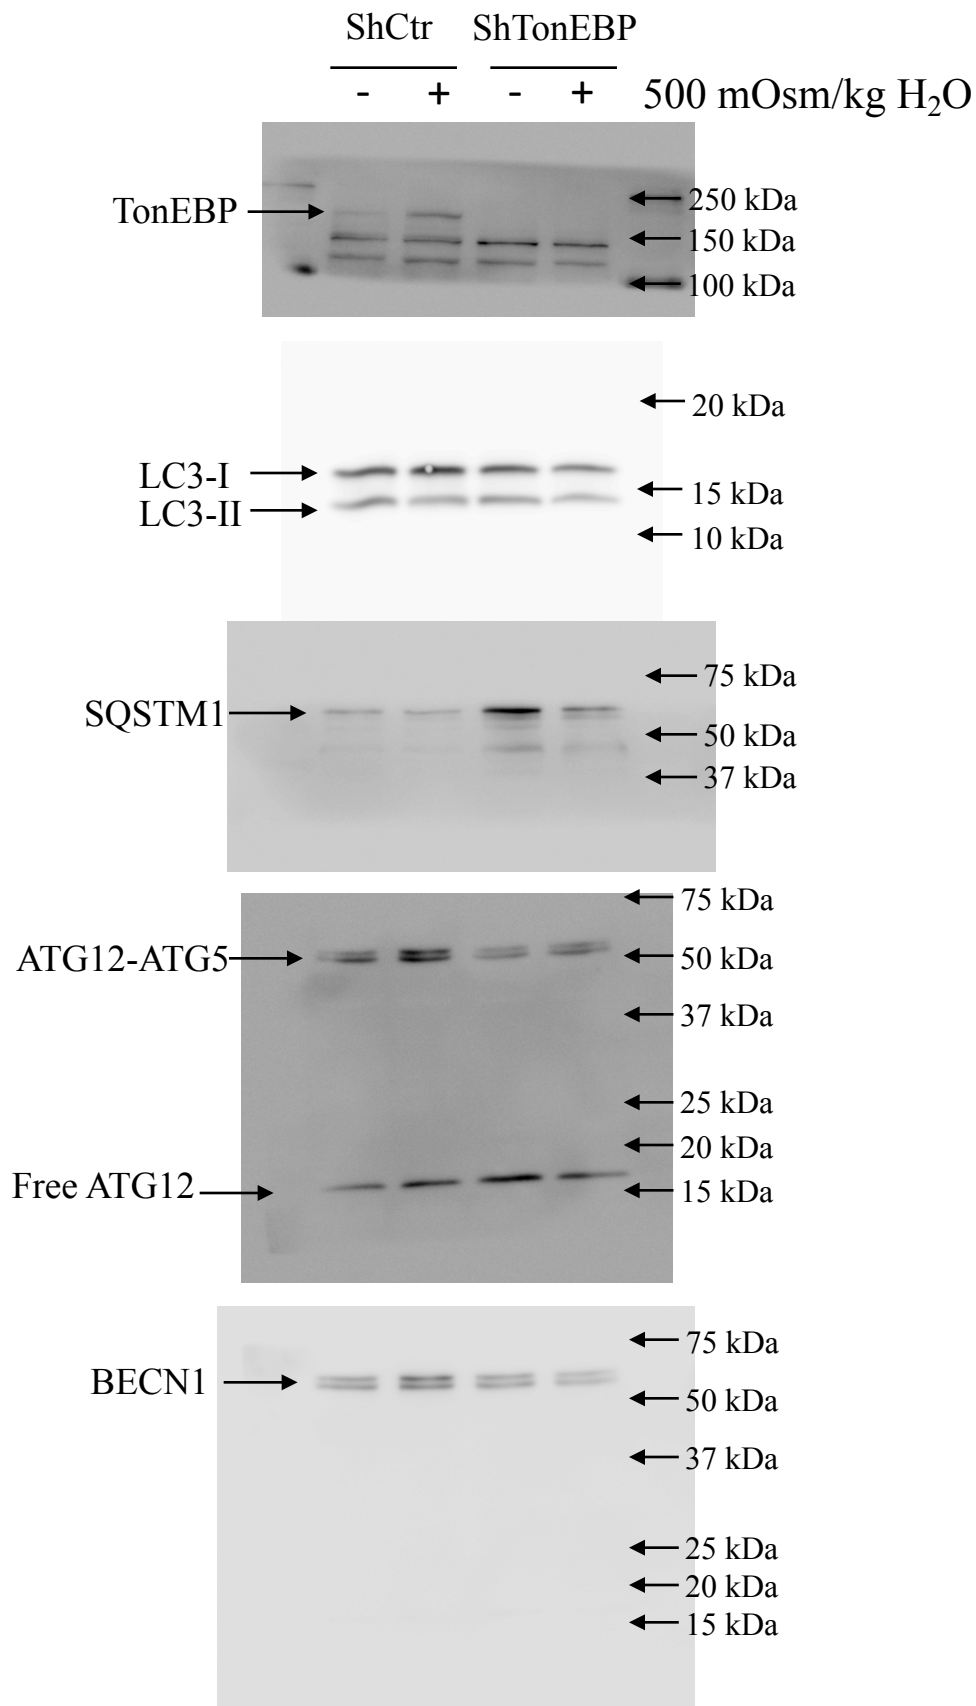

Examples of uncropped western blots for TonEBP, LC3, SQSTM1, ATG12-ATG5, and BECN1 from Figure 1A

## Supplementary Figure S1-2. Examples of uncropped Western blots

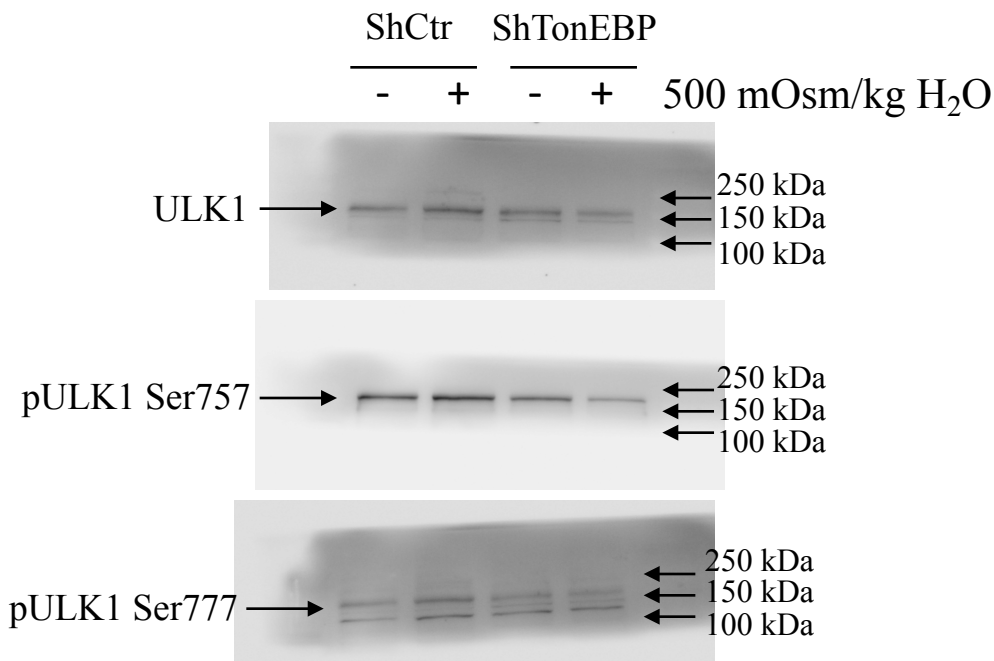

Examples of uncropped western blots for ULK1, pULK Ser757, and pULK Ser777 from Figure 1G

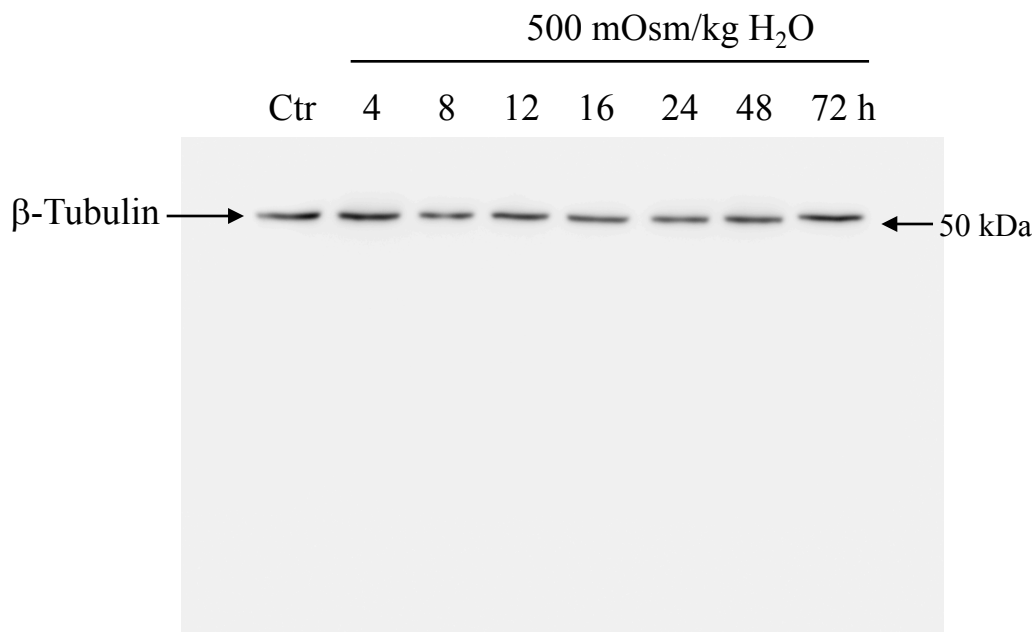

Example of uncropped western blot for  $\beta$ -Tubulin from Figure 3E

## Supplementary Figure S1-3. Example of uncropped Western blot

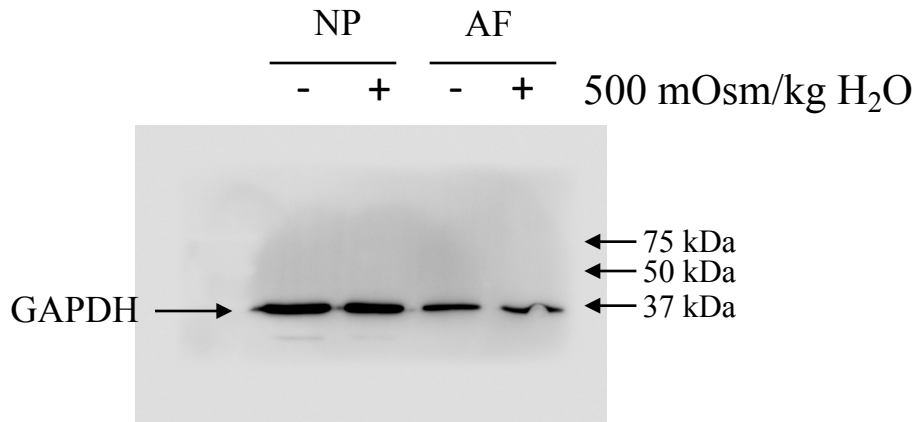

Example of uncropped western blot for GAPDH from Figure 8C
